# Supplementary material for: Design and Evaluation of Chimeric Plasmodium falciparum Circumsporozoite Protein-Based Malaria Vaccines
Source: MDPI journal article supplement (doi:10.3390/vaccines12040351), 2024-03-25
Supplement: s1 [file s1]

# Supplemental Material

Design and Evaluation of Chimeric *Plasmodium falciparum* Circumsporozoite  
Protein-Based Malaria Vaccines

William H. Stump †, Hayley J. Klingenberg †, Amy C. Ott, Donna M. Gonzales and James M. Burns, Jr. \*

Center for Molecular Parasitology, Department of Microbiology and Immunology, Drexel University College of  
Medicine, 2900 Queen Lane, Philadelphia, PA 19129, USA

\*Correspondence: [jmb53@drexel.edu](mailto:jmb53@drexel.edu)

†These authors contributed equally to this work.

**Table S1**  
**15-mer overlapping peptides of rPfCSP(#1)**

| Peptide Number | Peptide Sequence   | Peptide Location |
|----------------|--------------------|------------------|
| 1              | MAHHHHHHHPGGSGSG   | 1 - 15           |
| 2              | HHHPGGSGSGTSGSS    | 6 - 20           |
| 3              | SGTSGSSSNTRVLN     | 13 - 27          |
| 4              | SSNTRVLNELNYDNA    | 20 - 34          |
| 5              | NELNYDNAGTNLYNE    | 27 - 41          |
| 6              | AGTNLYNELEMNYYG    | 34 - 48          |
| 7              | ELEMNYYGKQENWYS    | 41 - 55          |
| 8              | GKQENWYSLKKNSRS    | 48 - 62          |
| 9              | SLKKNSRSLGENDDG    | 55 - 69          |
| 10             | SLGENDDGNNNNGDN    | 62 - 76          |
| 11             | GNNNNGDNGREGKDE    | 69 - 83          |
| 12             | NGREGKDEDKRDGNN    | 76 - 90          |
| 13             | EDKRDGNNEDNEKLR    | 83 - 97          |
| 14             | NEDNEKLRKPKHKKL    | 90 - 104         |
| 15             | RKPKHKKLKQPGDGN    | 97 - 111         |
| 16             | LKQPGDGNPDNPANP    | 104 - 118        |
| 17             | NPDNPANPNVDPNAN    | 111 - 125        |
| 18             | PNVDPNANPNVDPNA    | 118 - 132        |
| 19             | NPNVDPNANPNVDPN    | 125 - 139        |
| 20             | ANPNVDPNANPNANP    | 132 - 146        |
| 21             | PNANPLKNANPNANP    | 146 - 160        |
| 22             | NANPNANPNANPNAN    | Central Repeat   |
| 23             | NANPNANPNANPNKN    |                  |
| 24             | PNANPNKNNQGNGQG    | 181 - 195        |
| 25             | NNQGNGQGHNMPNDP    | 188 - 202        |
| 26             | GHNMPNDPNRNVDEN    | 195 - 209        |
| 27             | PNRNVDENANANNAV    | 202 - 216        |
| 28             | NANANNAVKNNNNEE    | 209 - 223        |
| 29             | VKNNNNEEPSDKHIE    | 216 - 230        |
| 30             | EPSDKHIEQYLKKIK    | 223 - 237        |
| 31*            | EQYLKKIKNSISTEW    | 230 - 244        |
| 32             | KNSISTEWSPCSVTC    | 237 - 251        |
| 33*            | WSPCSVTCGNGIQVR    | 244 - 258        |
| 34*            | CGNGIQVRIKPGSAN    | 251 - 265        |
| 35*            | RIKPGSANKPKDELD    | 258 - 272        |
| 36*            | NKPKDEL DYENDIEK   | 265 - 279        |
| 37*            | DYENDIEKKICKMEKCSS | 272 - 286        |
|                |                    | 279 - 296        |

\* Peptide Pool 6 for T cell assays

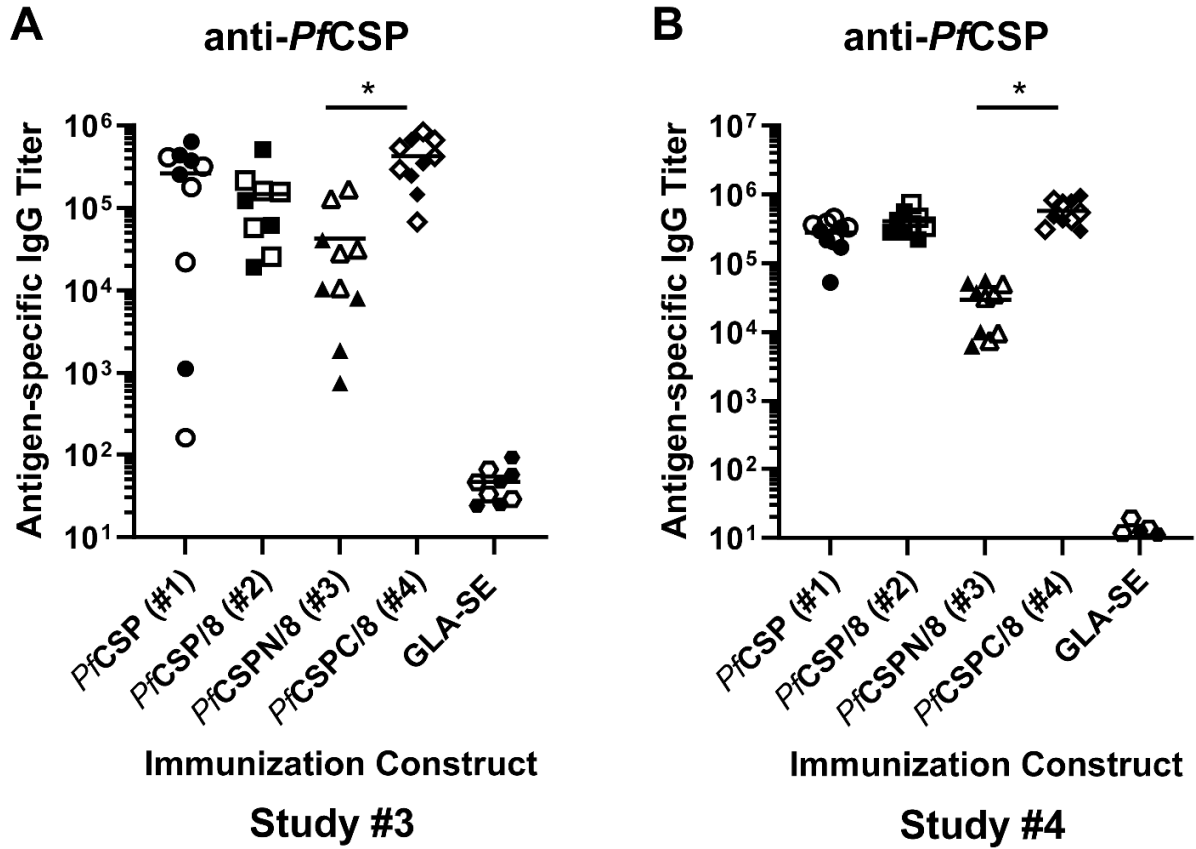

**Figure S1. Magnitude of vaccine-induced antibody responses in immunization studies 3 and 4.** Antigen-specific IgG titers were determined by ELISA on wells coated with *PfCSP* (#1) using secondary sera from CD1 mice (n=10 per group; female, open symbols; male, closed symbols) immunized with *rPfCSP* (#1, circles), *rPfCSP*/8 (#2, squares), *rPfCSPN*/8 (#3, triangles), *rPfCSPC*/8 (#4, diamonds) or GLA-SE (hexagons) in study #3 (panel A) and study #4 (panel B). Statistical significance of differences in titers were assessed by the Kruskal-Wallis test followed by Dunn's correction for multiple comparisons. \*  $p < 0.05$ .

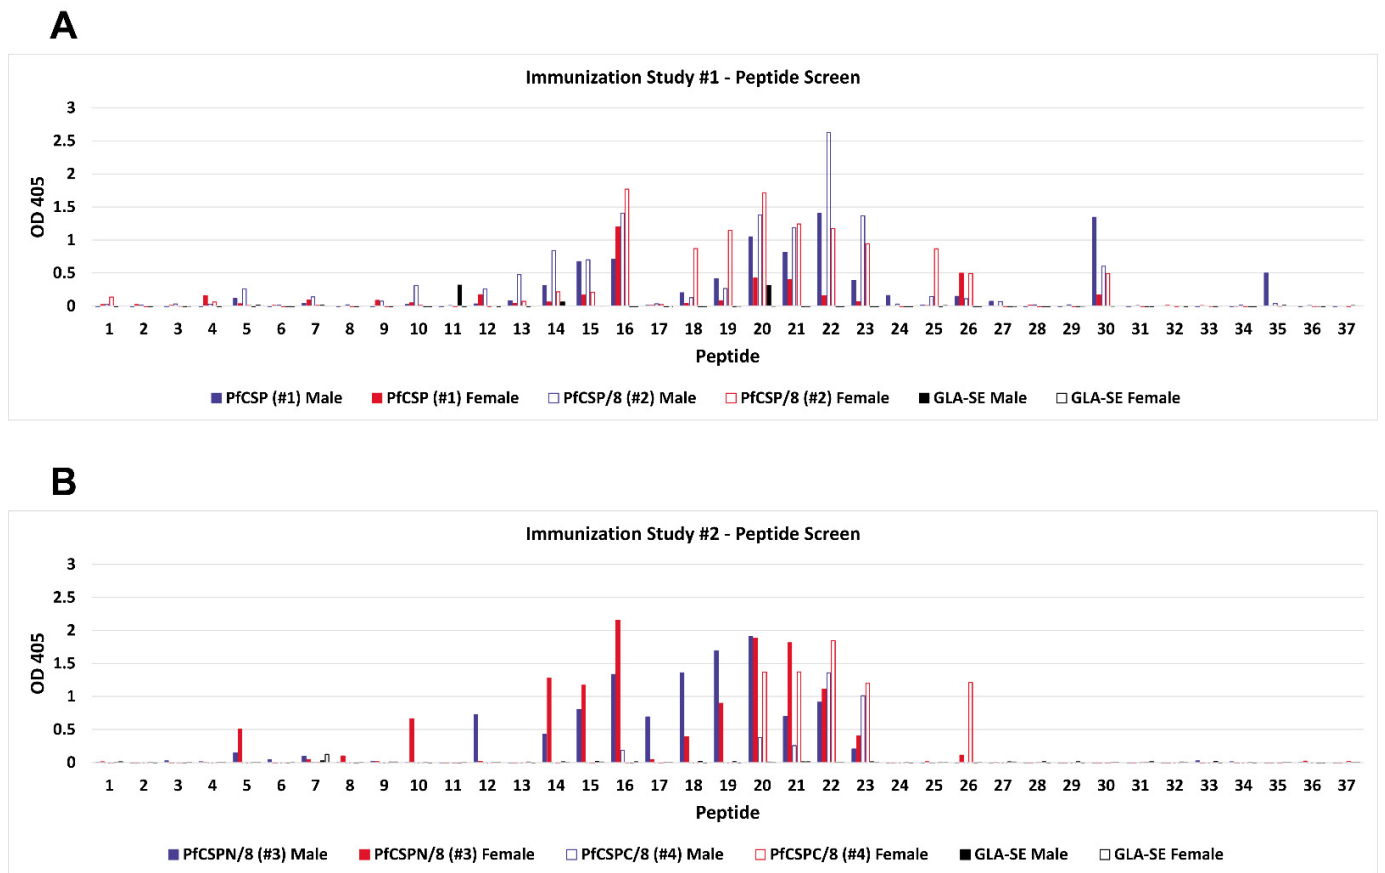

**Figure S2. Initial screen of the specificity of *rPfCSP* vaccine-induced antibodies.** Pools of sera from male (n=5, blue) and female (n=5, red) mice immunized with *rPfCSP* (#1), *rPfCSP/8* (#2), *rPfCSPN/8* (#3), or *rPfCSPC/8* (#4) were assessed by ELISA for reactivity with 37 overlapping 15 amino acid, biotinylated peptides spanning the length of *PfCSP* (#1). Sera from Study #1 is shown in **(A)** and Study #2 is shown in **(B)**. The OD<sub>405</sub> using sera assayed at a dilution of 1:1000 is plotted for each peptide in the array.

**A – Figure 2A, main manuscript**

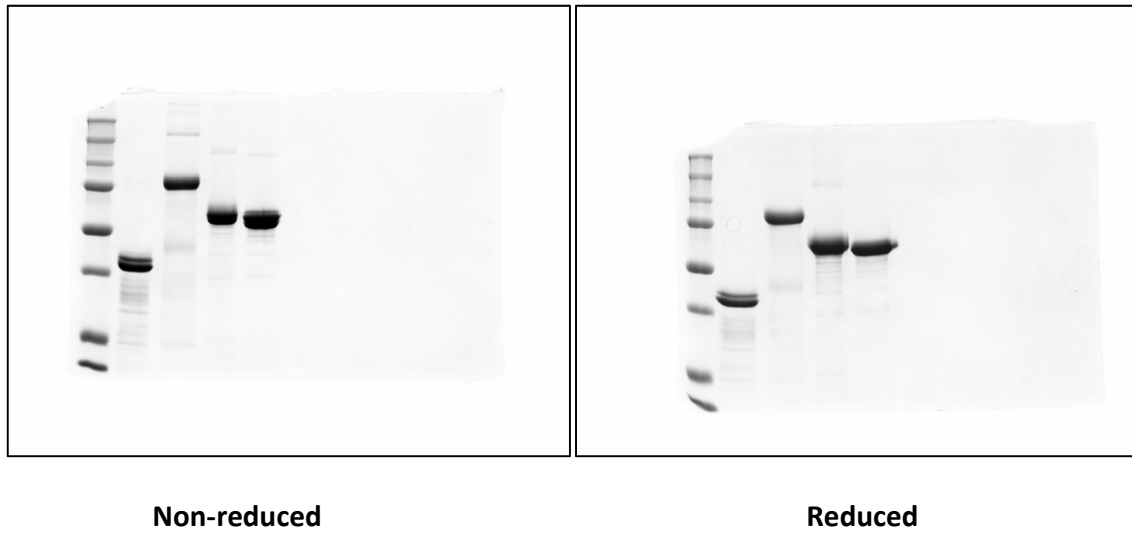

**B – Figure 2B, main manuscript**

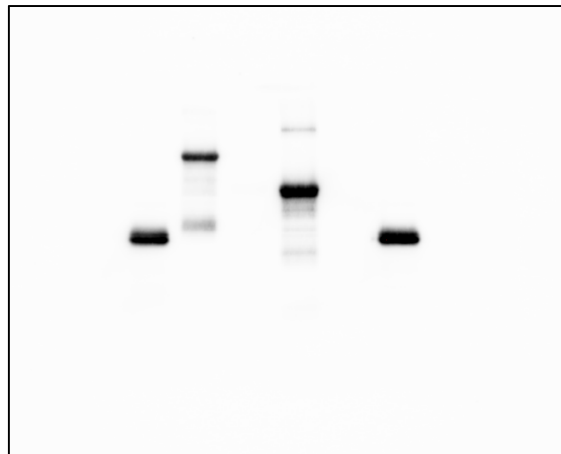

**Figure S3. Assessment of purified *rPfCSP*-based vaccines, original images. (A)** Full images of Figure 2A – Coomassie-blue stained SDS-PAGE gel of purified *rPfCSP*-based vaccines (#1-#4) run under non-reducing (left panel) and reducing (right panel) conditions. **(B)** Full image of Figure 2B immunoblot of purified, non-reduced *rPfCSP*-based vaccines (#1-#4) using mAb 4B3.
